# Supplementary material for: Evaluation of Calibration Performance of a Low-cost Particulate Matter Sensor Using Colocated and Distant NO 2
Source: Copernicus journal article supplement (doi:10.5194/egusphere-2023-1344), 2023-07-25
Supplement: Supplementary file 1 [file egusphere-2023-1344-supplement.pdf]

*Supplement of*

## **Evaluation of Calibration Performance for a Low-cost Particulate Matter Sensor Using Colocated NO<sub>2</sub> and Distance NO<sub>2</sub>**

Kabseok Ko<sup>1</sup>, Seokheon Cho<sup>2</sup>, Ramesh R. Rao<sup>2</sup>

5 <sup>1</sup>Department of Electronics Engineering, Kangwon National University, Chuncheon, 24341, Republic of Korea

<sup>2</sup>Qualcomm Institute, University of California, San Diego, La Jolla, 92093, USA

*Correspondence to:* Seokheon Cho (justinshcho@email.com)

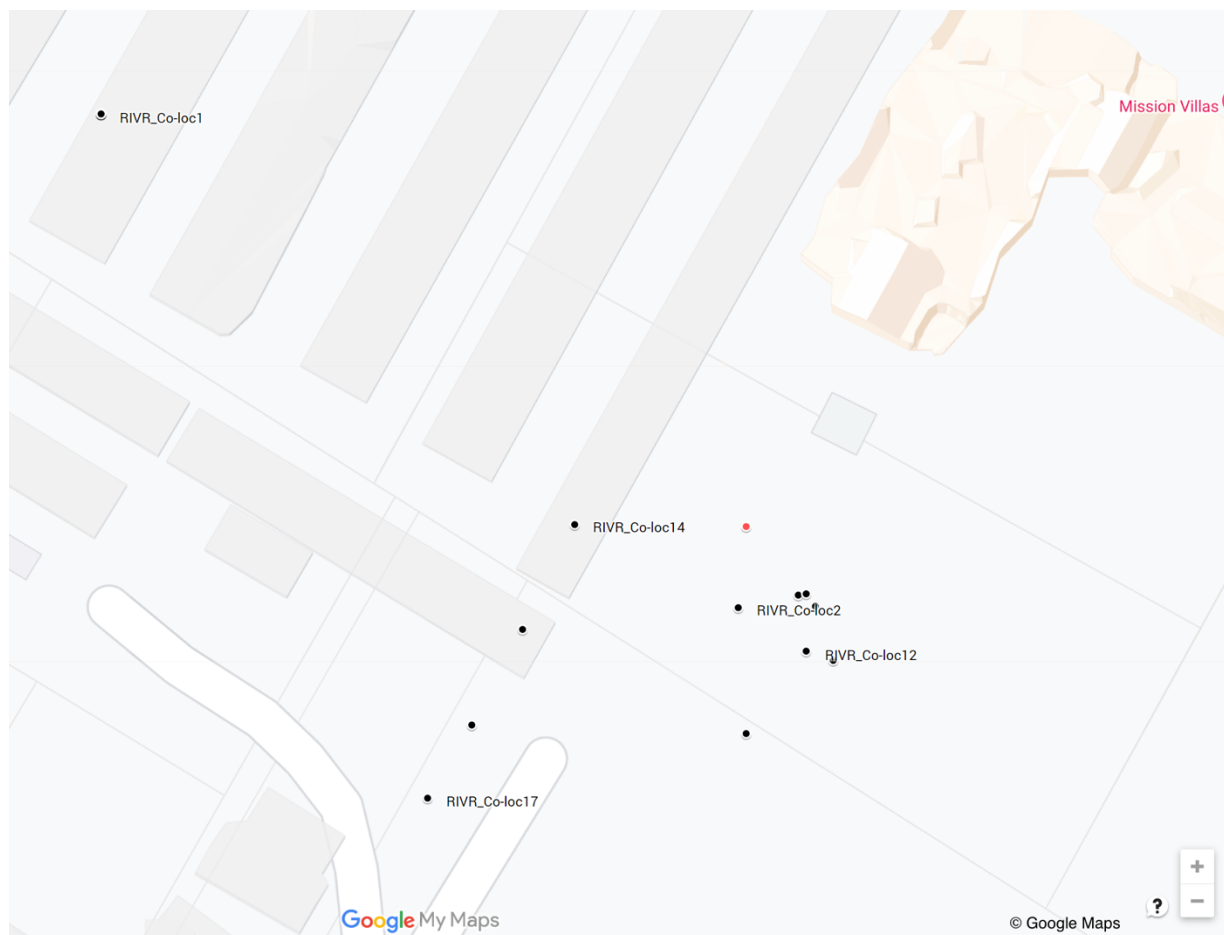

10 **Figure S1: Geographical locations of an air quality monitoring site (06-065-8001) and 14 PurpleAir PA-II units. The red dot represents BAM-1020 instrument, and the black dots represent 14 PurpleAir PA-II units.**

**Table S1 Distance of PurpleAir PA-II units from BAM-1020 instrument at the monitoring site of 06-065-8001**

|              |               |               |               |               |               |               |
|--------------|---------------|---------------|---------------|---------------|---------------|---------------|
| Sensor Name  | RIVR_Co-loc1  | RIVR_Co-loc2  | RIVR_Co-loc3  | RIVR_Co-loc4  | RIVR_Co-loc5  | RIVR_Co-loc6  |
| Distance (m) | 82.09         | 8.61          | 82.09         | 82.09         | 82.09         | 82.09         |
| Sensor Name  | RIVR_Co-loc7  | RIVR_Co-loc8  | RIVR_Co-loc9  | RIVR_Co-loc10 | RIVR_Co-loc11 | RIVR_Co-loc12 |
| Distance (m) | 9.10          | 82.09         | 22.13         | 9.61          | 11.22         | 14.82         |
| Sensor Name  | RIVR_Co-loc13 | RIVR_Co-loc14 | RIVR_Co-loc15 | RIVR_Co-loc16 | RIVR_Co-loc17 |               |
| Distance (m) | 17.05         | 18.44         | 26.33         | 36.35         | 44.78         |               |

15

**Table S2 Summary of MLR models and their p-values and VIF values with the selected combinations of features**

|   | MLR model                                                                                                                 | p-values                                   | VIF                                               |
|---|---------------------------------------------------------------------------------------------------------------------------|--------------------------------------------|---------------------------------------------------|
| 1 | $0.459PM_{2.5} + 13.293$                                                                                                  | (0.000)                                    | X                                                 |
| 2 | $0.465PM_{2.5} + 0.0745T + 13.293$                                                                                        | (0.000, 0.000)                             | (1.008, 1.008)                                    |
| 3 | $0.468PM_{2.5} - 0.0563RH + 13.293$                                                                                       | (0.000, 0.000)                             | (1.147, 1.147)                                    |
| 4 | $0.502PM_{2.5} - 0.0658RH - 0.00244PM_{2.5} \times RH + 13.568$                                                           | (0.000, 0.000, 0.000)                      | (1.413, 1.205, 1.234)                             |
| 5 | $0.474PM_{2.5} + 0.0532T - 0.0293RH + 13.293$                                                                             | (0.000, 0.000, 0.000)                      | (1.180, 1.599, 1.819)                             |
| 6 | $0.494PM_{2.5} + 0.0417T - 0.0434RH - 0.00211PM_{2.5} \times RH + 13.568$                                                 | (0.000, 0.000, 0.000, 0.000)               | (1.498, 1.669, 1.992, 1.288)                      |
| 7 | $0.489PM_{2.5} + 0.0376T - 0.0454RH - 0.00154PM_{2.5} \times T - 0.00289PM_{2.5} \times RH + 13.629$                      | (0.000, 0.000, 0.000, 0.000, 0.000)        | (1.613, 1.709, 2.008, 2.149, 2.078)               |
| 8 | $0.485PM_{2.5} + 0.0546T - 0.0379RH - 0.00215PM_{2.5} \times T - 0.00304PM_{2.5} \times RH + 0.00167T \times RH + 13.927$ | (0.000, 0.000, 0.000, 0.000, 0.000, 0.000) | (1.643, 2.159, 2.148, 2.369, 2.097, 1.439)        |
| 9 | $0.495PM_{2.5} + 0.0494T - 0.0399RH - 0.00207PM_{2.5} \times T - 0.00279PM_{2.5} \times RH +$                             | (0.000, 0.000, 0.000, 0.000, 0.000, 0.000) | (2.570, 2.314, 2.186, 2.385, 2.290, 1.465, 2.402) |

|    |                                                                                                                                                                                    |                                                                 |                                                                 |
|----|------------------------------------------------------------------------------------------------------------------------------------------------------------------------------------|-----------------------------------------------------------------|-----------------------------------------------------------------|
|    | $0.00178T \times RH + 0.00005PM_{2.5} \times T \times RH + 13.934$                                                                                                                 |                                                                 |                                                                 |
| 10 | $0.450PM_{2.5} + 0.0465NO_2 + 13.293$                                                                                                                                              | (0.000, 0.000)                                                  | (1.106, 1.106)                                                  |
| 11 | $0.445PM_{2.5} + 0.0465NO_2 + 0.0009PM_{2.5} \times NO_2 + 13.235$                                                                                                                 | (0.000, 0.000, 0.000)                                           | (1.382, 1.106, 1.278)                                           |
| 12 | $0.446PM_{2.5} + 0.111T + 0.112NO_2 + 13.293$                                                                                                                                      | (0.000, 0.000, 0.000)                                           | (1.109, 1.245, 1.365)                                           |
| 13 | $0.437PM_{2.5} + 0.112T + 0.113NO_2 + 0.00144PM_{2.5} \times NO_2 + 13.196$                                                                                                        | (0.000, 0.000, 0.000, 0.000)                                    | (1.393, 1.253, 1.367, 1.287)                                    |
| 14 | $0.443PM_{2.5} + 0.116T + 0.114NO_2 + 0.00155PM_{2.5} \times T + 0.00234PM_{2.5} \times NO_2 + 13.169$                                                                             | (0.000, 0.000, 0.000, 0.000, 0.000)                             | (1.498, 1.280, 1.367, 1.860, 1.821)                             |
| 15 | $0.442PM_{2.5} + 0.119T + 0.120NO_2 + 0.00136PM_{2.5} \times T + 0.00234PM_{2.5} \times NO_2 + 0.00103T \times NO_2 + 13.293$                                                      | (0.000, 0.000, 0.000, 0.000, 0.000, 0.003)                      | (1.509, 1.362, 1.672, 2.027, 1.849, 1.355)                      |
| 16 | $0.464PM_{2.5} + 0.0924T - 0.0180RH + 0.0990NO_2 - 0.00146PM_{2.5} \times RH + 13.483$                                                                                             | (0.000, 0.000, 0.000, 0.000, 0.000)                             | (1.859, 2.363, 2.278, 1.578, 1.351)                             |
| 17 | $0.452PM_{2.5} + 0.100T - 0.0116RH + 0.103NO_2 - 0.00164PM_{2.5} \times RH + 0.00179PM_{2.5} \times NO_2 + 13.385$                                                                 | (0.000, 0.000, 0.002, 0.000, 0.000, 0.000)                      | (2.239, 2.461, 2.390, 1.590, 1.380, 1.423)                      |
| 18 | $0.452PM_{2.5} + 0.103T - 0.0129RH + 0.111NO_2 - 0.00158PM_{2.5} \times RH + 0.00179PM_{2.5} \times NO_2 + 0.00131T \times NO_2 + 13.480$                                          | (0.000, 0.000, 0.001, 0.000, 0.000, 0.000, 0.000)               | (2.239, 2.516, 2.410, 1.858, 1.394, 1.423, 1.276)               |
| 19 | $0.456PM_{2.5} + 0.111T - 0.00783RH + 0.100NO_2 - 0.00167PM_{2.5} \times T - 0.00227PM_{2.5} \times RH + 0.00213T \times RH + 0.000939RH \times NO_2 + 13.890$                     | (0.000, 0.000, 0.048, 0.000, 0.000, 0.000, 0.000, 0.002)        | (1.976, 3.023, 2.633, 1.620, 2.394, 2.348, 1.658, 1.429)        |
| 20 | $0.456PM_{2.5} + 0.112T - 0.0097RH + 0.110NO_2 - 0.00185PM_{2.5} \times T - 0.00240PM_{2.5} \times RH + 0.00199T \times RH + 0.0059T \times NO_2 + 0.00145RH \times NO_2 + 13.984$ | (0.000, 0.000, 0.015, 0.000, 0.000, 0.000, 0.000, 0.000, 0.000) | (1.977, 3.025, 2.668, 1.966, 2.468, 2.406, 1.703, 1.756, 1.684) |

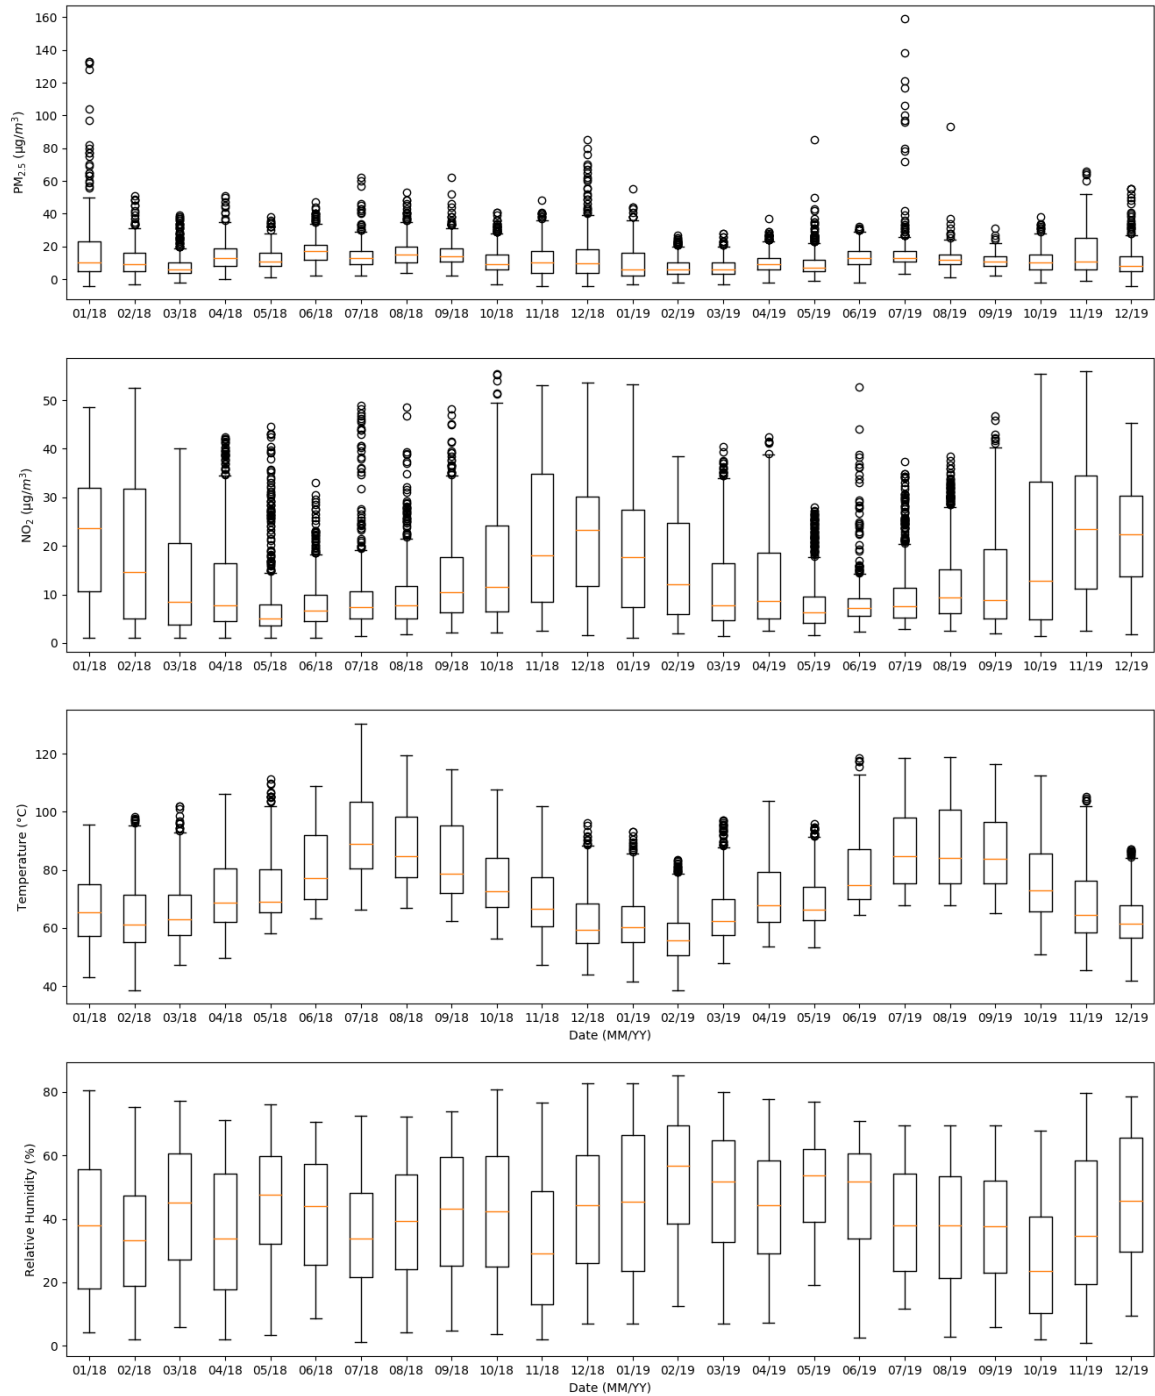

20

**Figure S2 Distributions of PM<sub>2.5</sub> (regulatory monitor), NO<sub>2</sub> (regulatory monitor), temperature (PA-II), and relative humidity (PA-II) for each month over 2-year period**
